# Supplementary material for: Transcriptomic and Proteomic Analysis of CRISPR/Cas9-Mediated ARC-Knockout HEK293 Cells
Source: MDPI journal article supplement (doi:10.3390/ijms23094498), 2022-04-19
Supplement: s1 [file s1]

(A)

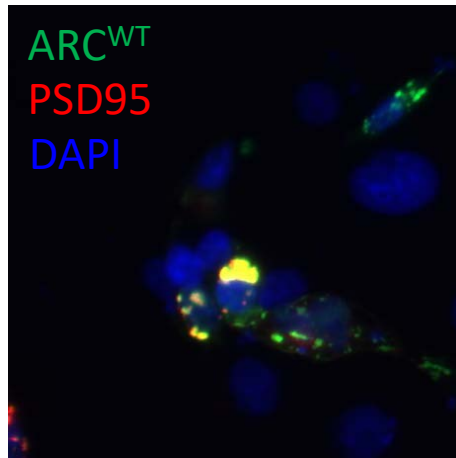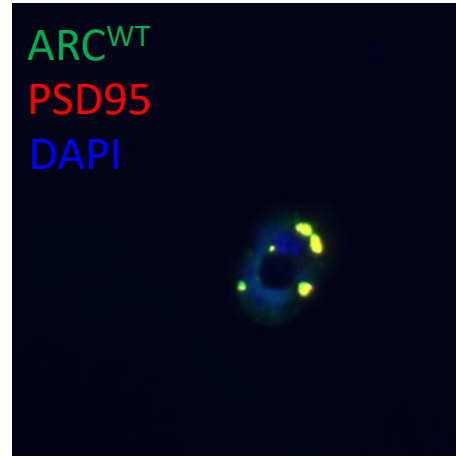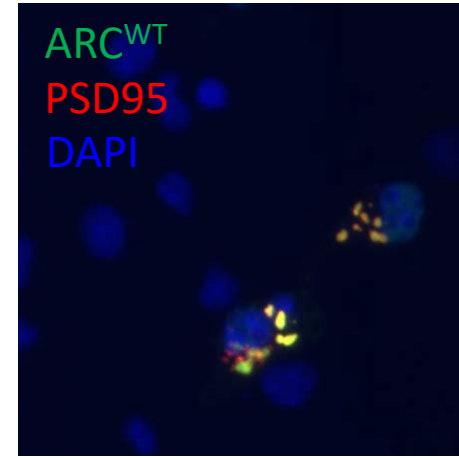

(C)

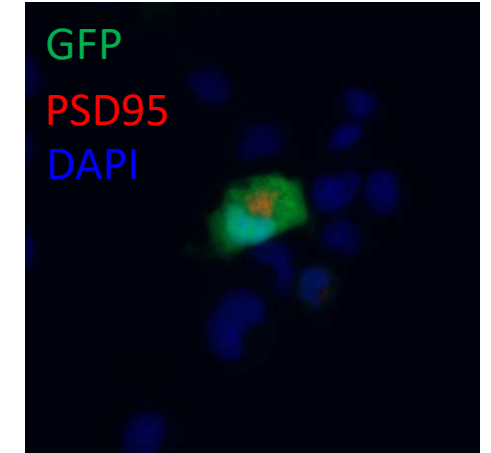

(B)

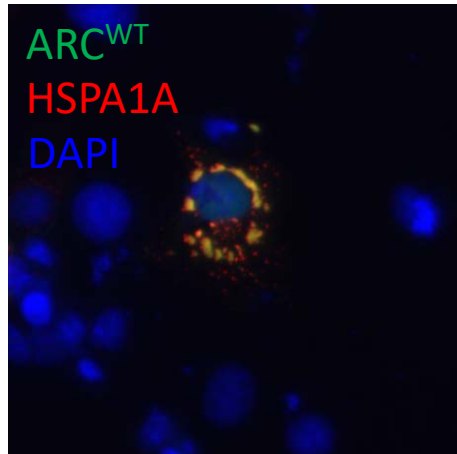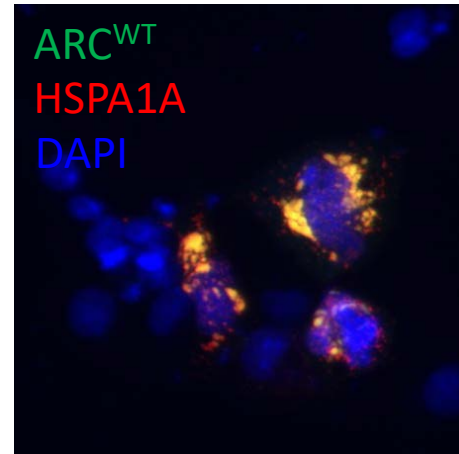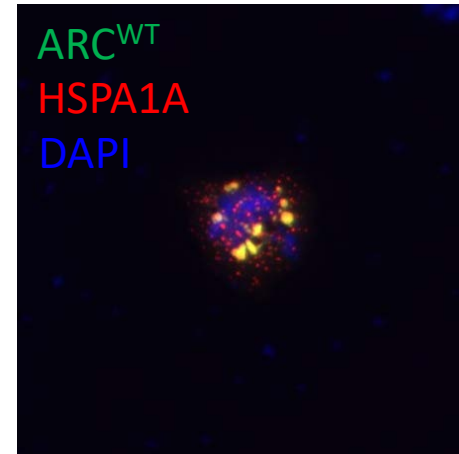

**Supplementary Figure S1.** ARC<sup>WT</sup> (green) colocalized with (A) PSD95 (red) and (B) HSPA1A (red) in transfected COS-1 cells. (C) GFP (green) did not colocalize with PSD95 (red). DAPI (blue), 4',6-diamidino-2-phenylindole.
