# Supplementary material for: Transcriptomic and Proteomic Analysis of CRISPR/Cas9-Mediated ARC-Knockout HEK293 Cells
Source: MDPI journal article supplement (doi:10.3390/ijms23094498), 2022-04-19
Supplement: s1 [file s1]

**Supplementary Table S4.** The number of identifications in each sample.

| Sample   | Protein ID | Peptide ID | PSM   | Search input |
|----------|------------|------------|-------|--------------|
| ARC-WT_1 | 813        | 6025       | 12481 | 20181        |
| ARC-WT_2 | 828        | 6056       | 12655 | 20260        |
| ARC-WT_3 | 836        | 6017       | 12549 | 20177        |
| ARC-KO_1 | 850        | 6180       | 12621 | 20053        |
| ARC-KO_2 | 820        | 6154       | 12634 | 20034        |
| ARC-KO_3 | 832        | 6101       | 12574 | 20022        |
