# Supplementary material for: Transcriptomic and Proteomic Analysis of CRISPR/Cas9-Mediated ARC-Knockout HEK293 Cells
Source: MDPI journal article supplement (doi:10.3390/ijms23094498), 2022-04-19
Supplement: s1 [file s1]

**Supplementary Table S1.** The off-target sites for *ARC* gRNA.

| Location       | Number of mismatches | Sequence (including mismatches)                     |
|----------------|----------------------|-----------------------------------------------------|
| chr19:50469223 | 3                    | CC <b>C</b> tAGCACCT <b>tt</b> GCACAGATGG           |
| chr2:200696040 | 3                    | CCAGAGCA <b>g</b> CT <b>c</b> CGCACAGAT <b>t</b> G  |
| chr21:31356832 | 3                    | CCATCTG <b>g</b> GCGCAG <b>tg</b> GCTCAGG           |
| chr4:6172657   | 3                    | CC <b>t</b> TCTGT <b>c</b> C <b>c</b> CAGGTGCTCAGG  |
| chr9:93267363  | 3                    | CCTG <b>g</b> GCACCTG <b>t</b> GC <b>c</b> CAGATGG  |
| chrX:68878063  | 3                    | CCGG <b>t</b> GCACCA <b>a</b> G <b>g</b> GCACAGATGG |

Small bold letters mean mismatch nucleotide.
