# Supplementary material for: Transcriptomic and Proteomic Analysis of CRISPR/Cas9-Mediated ARC-Knockout HEK293 Cells
Source: MDPI journal article supplement (doi:10.3390/ijms23094498), 2022-04-19
Supplement: s1 [file s1]

**Supplementary Table S2.** RNA read summary of *ARC*-KO HEK293 cells (KO) and wild type HEK293 cells (WT) libraries.

| Sample   | Total Reads      | Unmapped        | Total Mapped       | Multiple Mapped  | Uniquely Mapped    | Splice reads ( UM ) | Non-splice reads ( UM ) |
|----------|------------------|-----------------|--------------------|------------------|--------------------|---------------------|-------------------------|
| ARC-WT_1 | 43171932 (100 %) | 722881 (1.67 %) | 42449051 (98.33 %) | 2677367 (6.2 %)  | 39771684 (92.12 %) | 24409895 (56.54 %)  | 15361789 (35.58 %)      |
| ARC-WT_2 | 40147588 (100 %) | 681602 (1.7 %)  | 39465986 (98.3 %)  | 2218278 (5.53 %) | 37247708 (92.78 %) | 22453145 (55.93 %)  | 14794563 (36.85 %)      |
| ARC-WT_3 | 40411842 (100 %) | 806274 (2 %)    | 39605568 (98 %)    | 1987502 (4.92 %) | 37618066 (93.09 %) | 22645360 (56.04 %)  | 14972706 (37.05 %)      |
| ARC-KO_1 | 42238834 (100 %) | 639661 (1.51 %) | 41599173 (98.49 %) | 2122187 (5.02 %) | 39476986 (93.46 %) | 23883427 (56.54 %)  | 15593559 (36.92 %)      |
| ARC-KO_2 | 46470614 (100 %) | 676768 (1.46 %) | 45793846 (98.54 %) | 2283717 (4.91 %) | 43510129 (93.63 %) | 26935132 (57.96 %)  | 16574997 (35.67 %)      |
| ARC-KO_3 | 44057278 (100 %) | 636571 (1.44 %) | 43420707 (98.56 %) | 1937483 (4.4 %)  | 41483224 (94.16 %) | 25016603 (56.78 %)  | 16466621 (37.38 %)      |
